# Supplementary material for: High performance and recyclable Au-Ag/TiO2/PS substrate for the detection of organic pollutants
Source: Research Square preprint supplement (doi:10.21203/rs.3.rs-7812912/v1), 2025-10-31
Supplement: Supplementary file 1 [file 46eed7d8114f23a36b6a23ef.docx]

**Supporting Information**

**High performance and recyclable Au-Ag/TiO2/PS substrate for the detection of organic pollutants**

Lingling Yan1, Junhui Yi1, Hongxin Cai1[[1]](#footnote-1)*, Yixin Shao1, Liang Chen1[[2]](#footnote-2)*, Qiang Hu1, and Lingli Wang2

*1 School of Physics and Electronic Information Engineering, Henan Polytechnic University, Jiaozuo, 454000, PR China*

*2 School of Electronics and Information, Zhengzhou University of Light Industry, Zhengzhou, 450002, PR China*


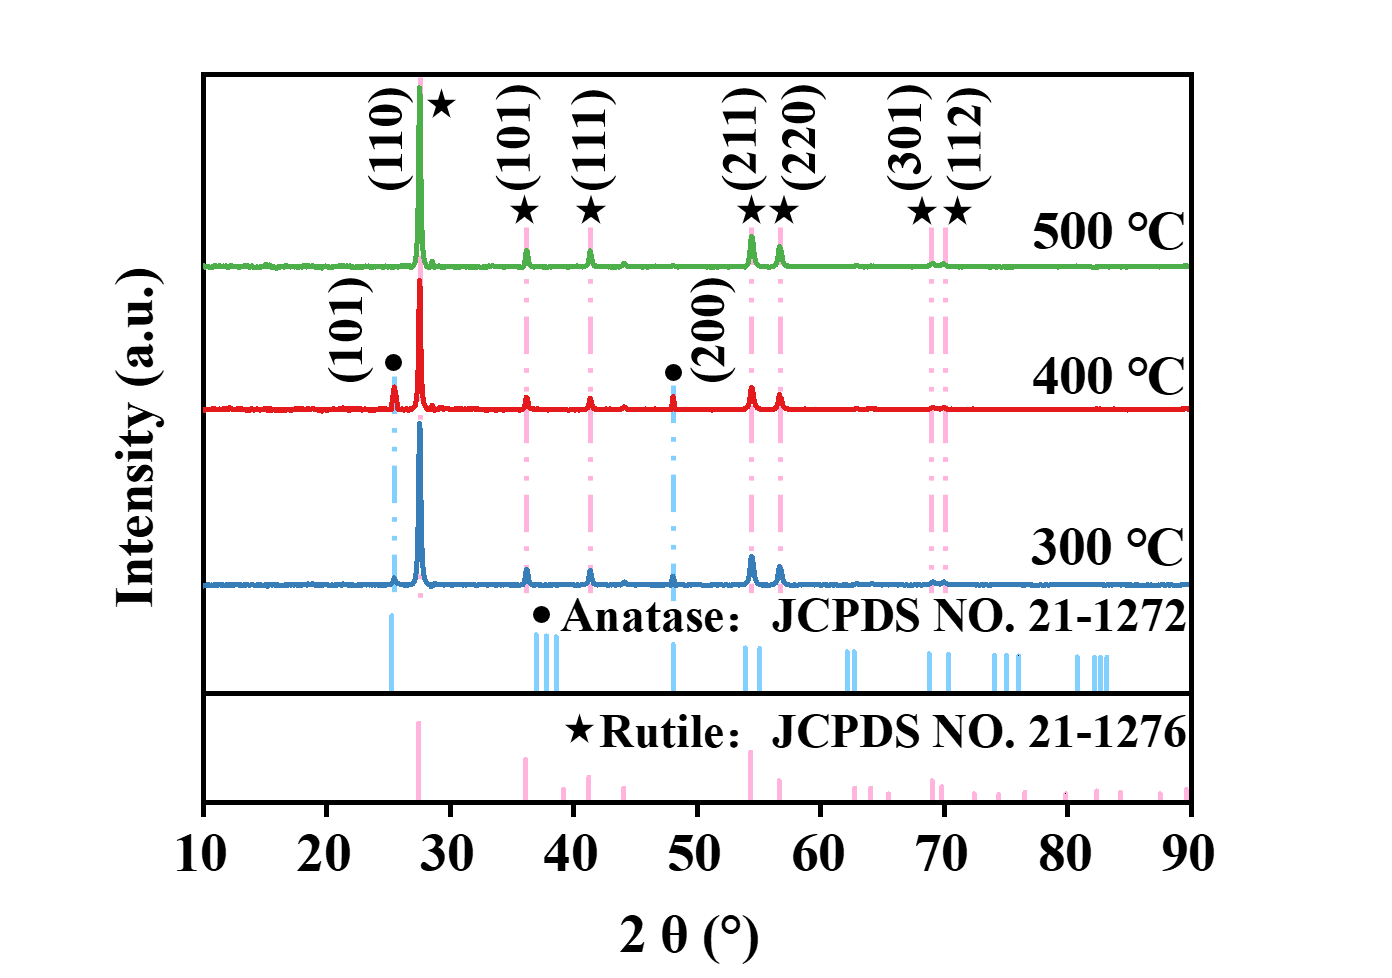


**Fig. S1.** XRD patterns of the samples obtained at different annealing temperatures.


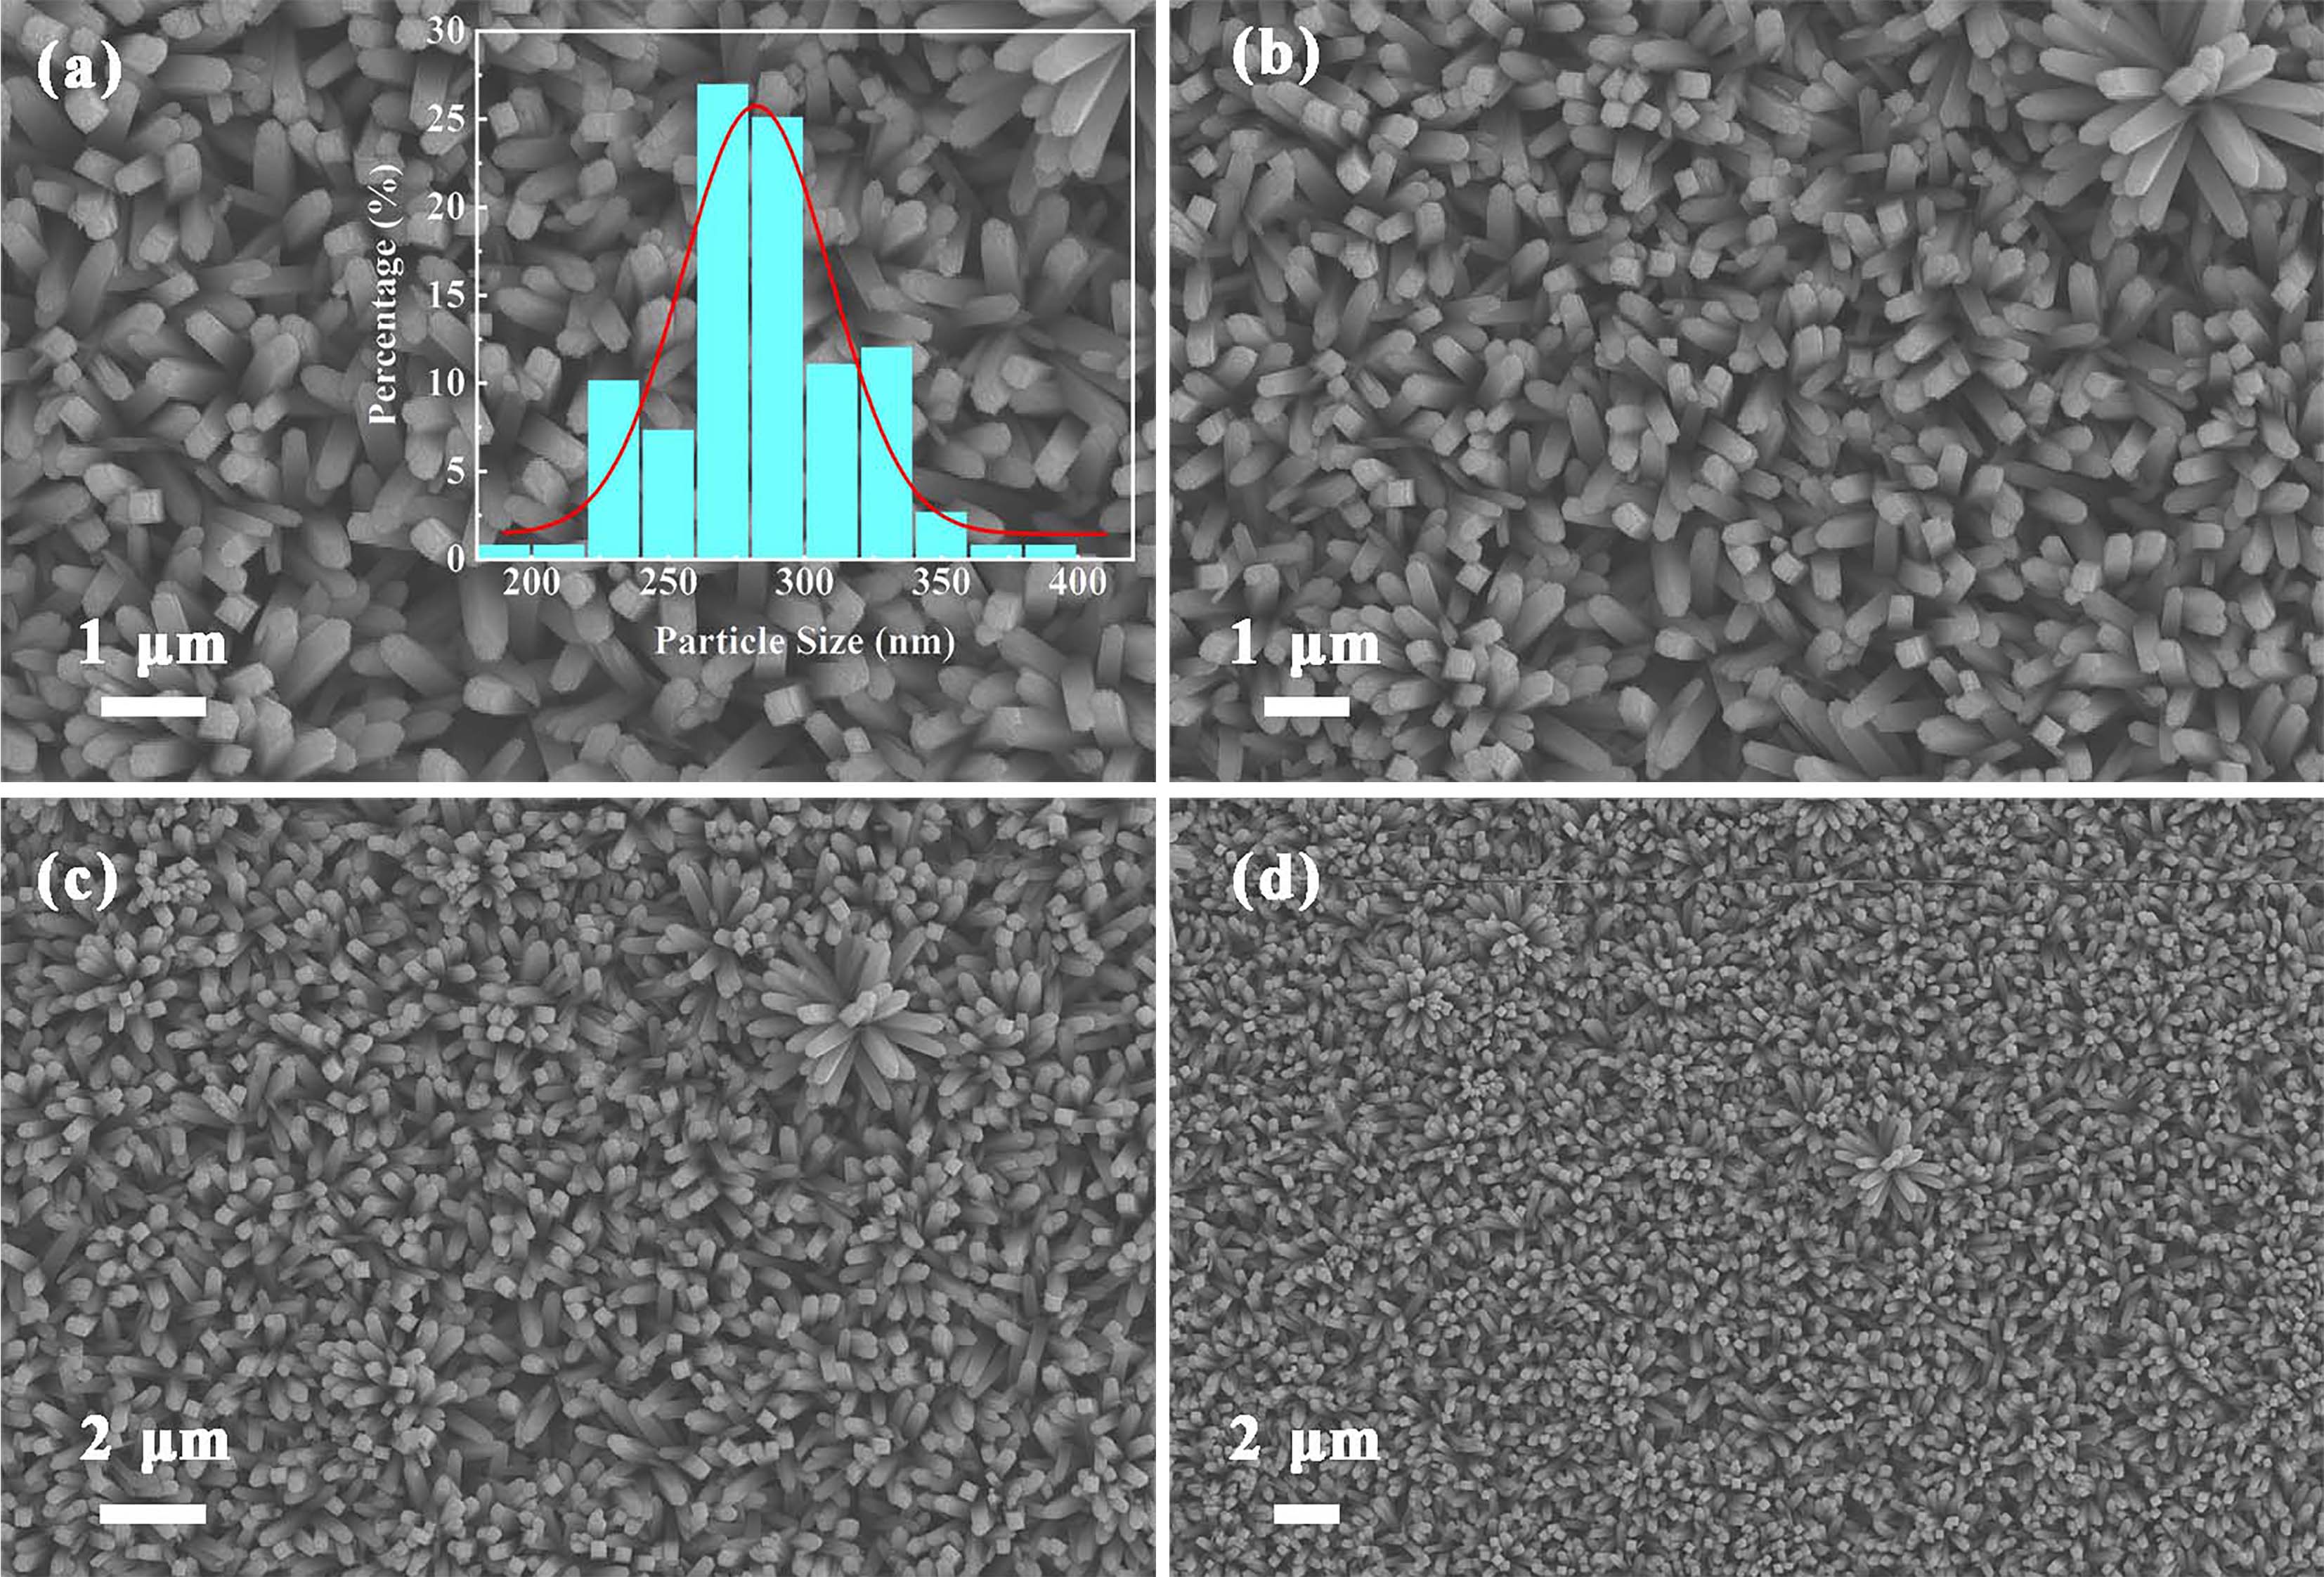

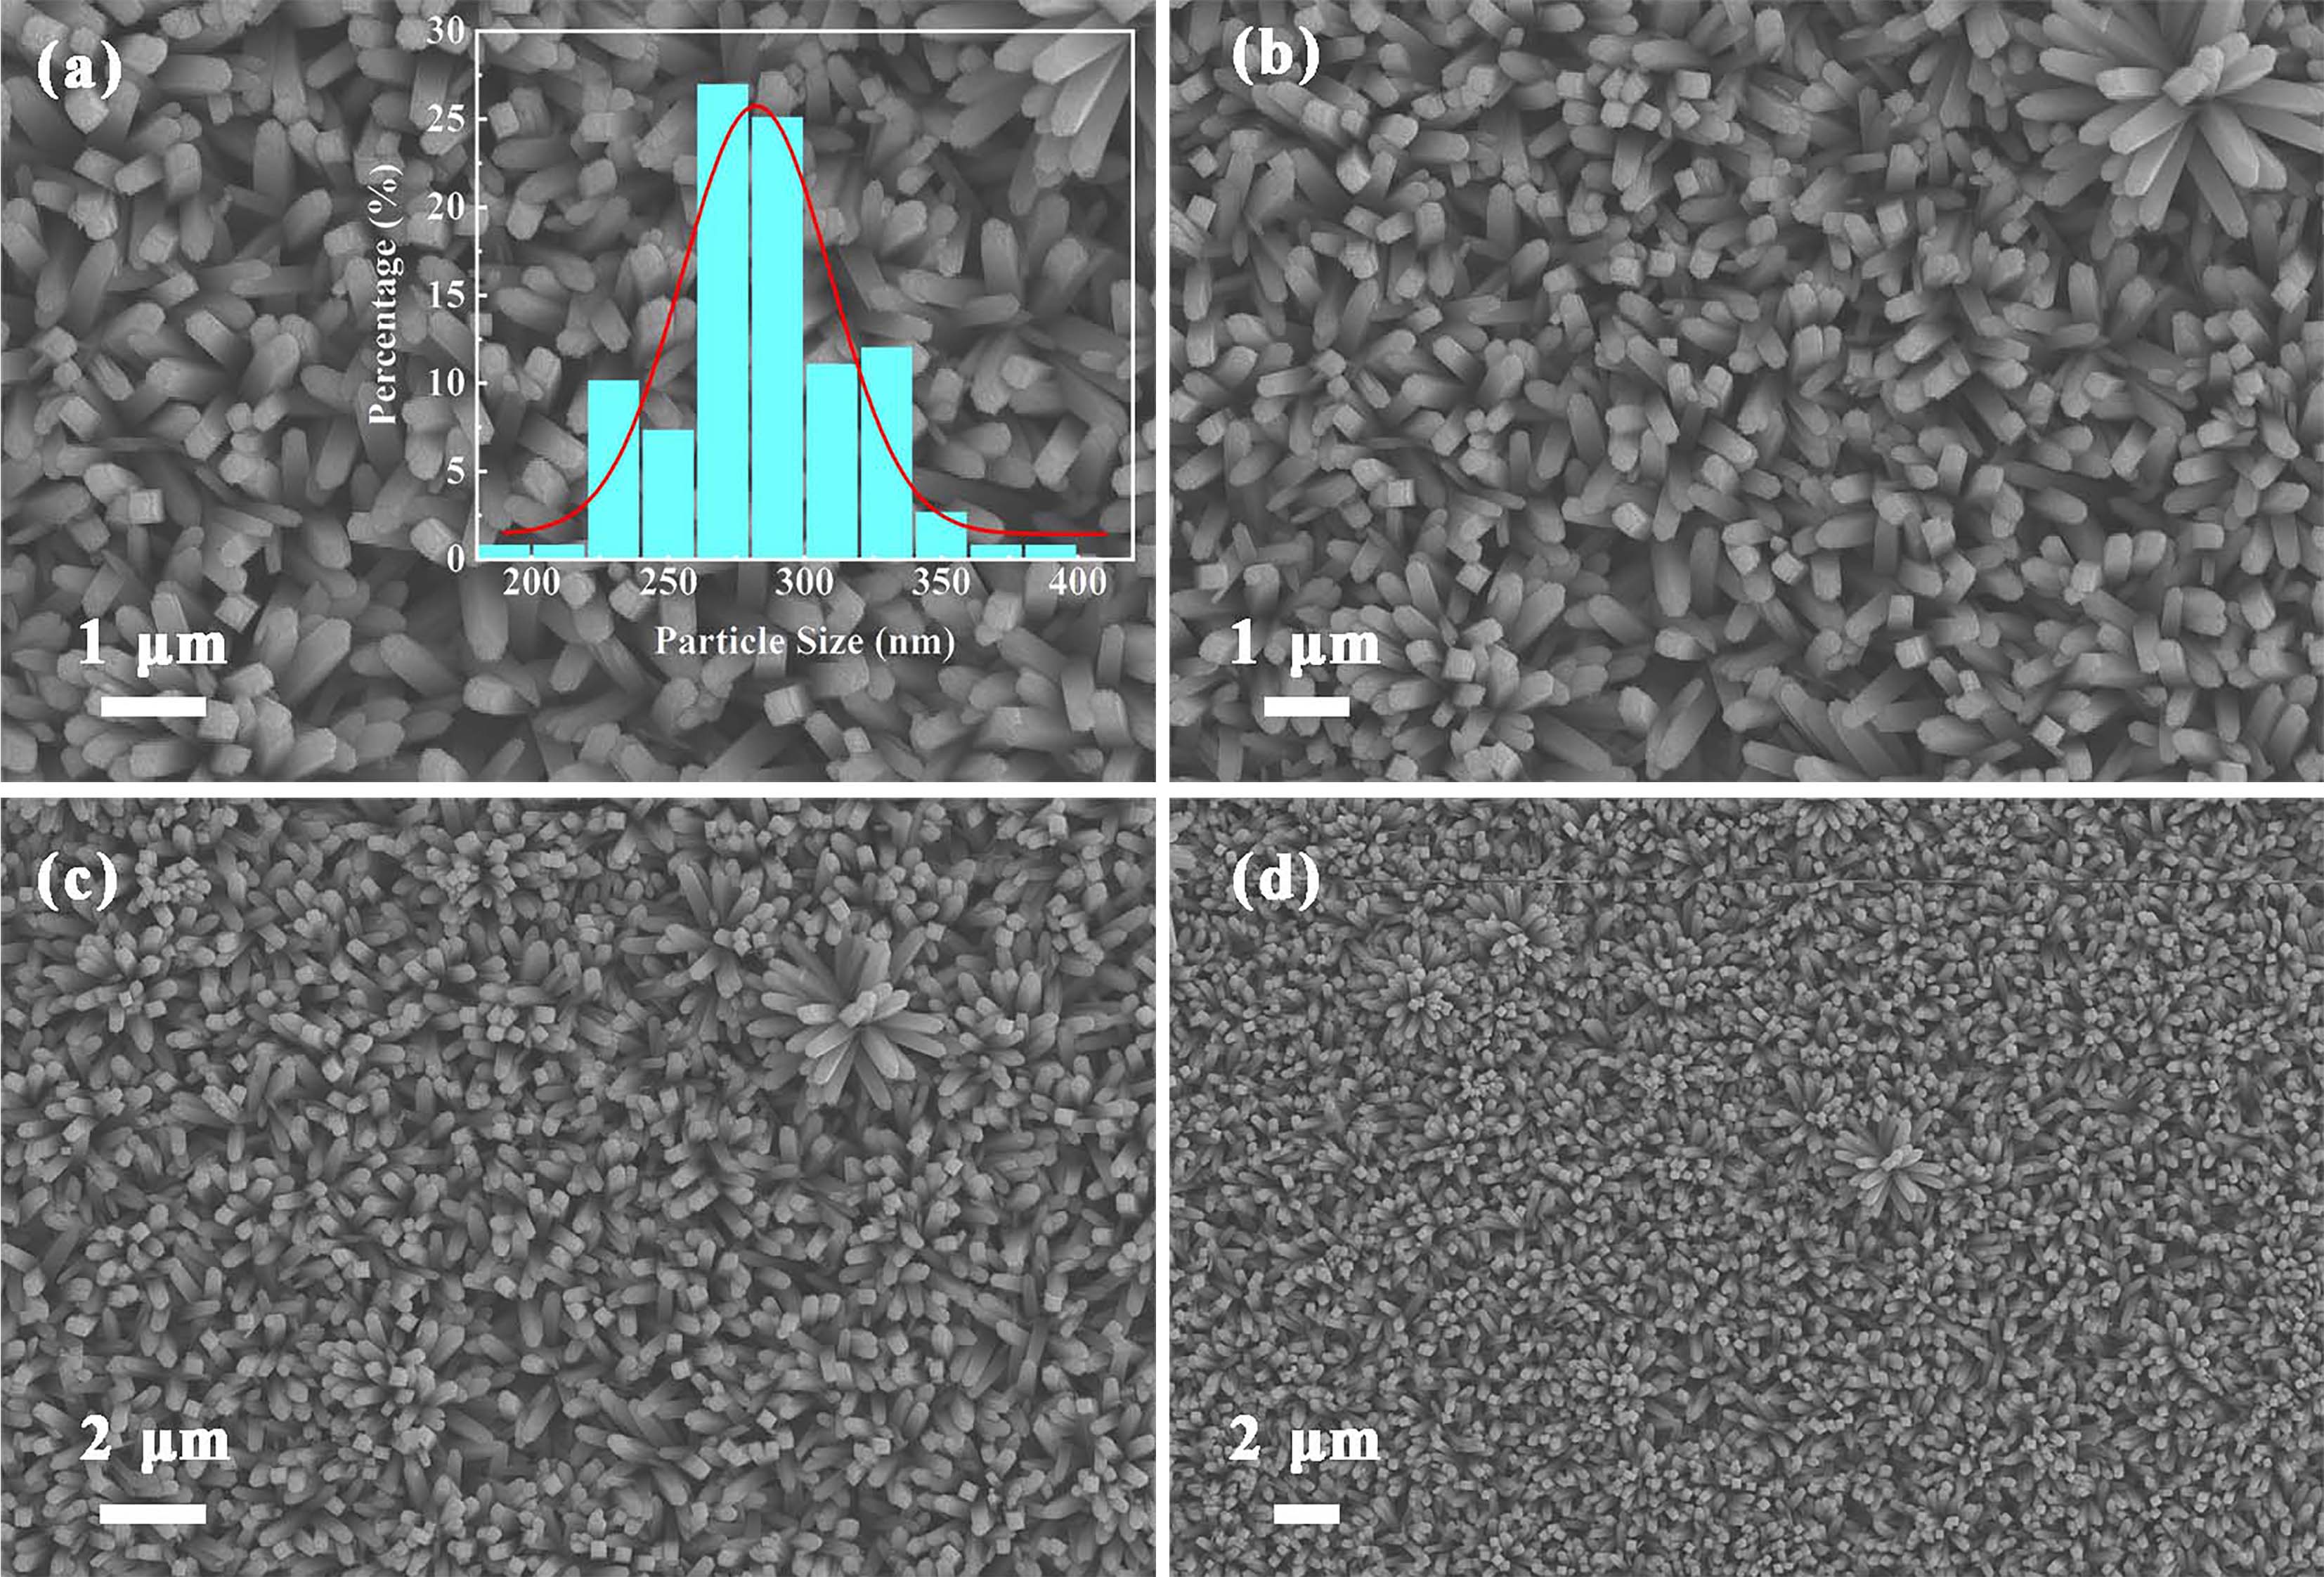


**Fig. S2.** SEM images of TiO2/PS. (Inset: the frequency distribution histogram of TiO2/PS)


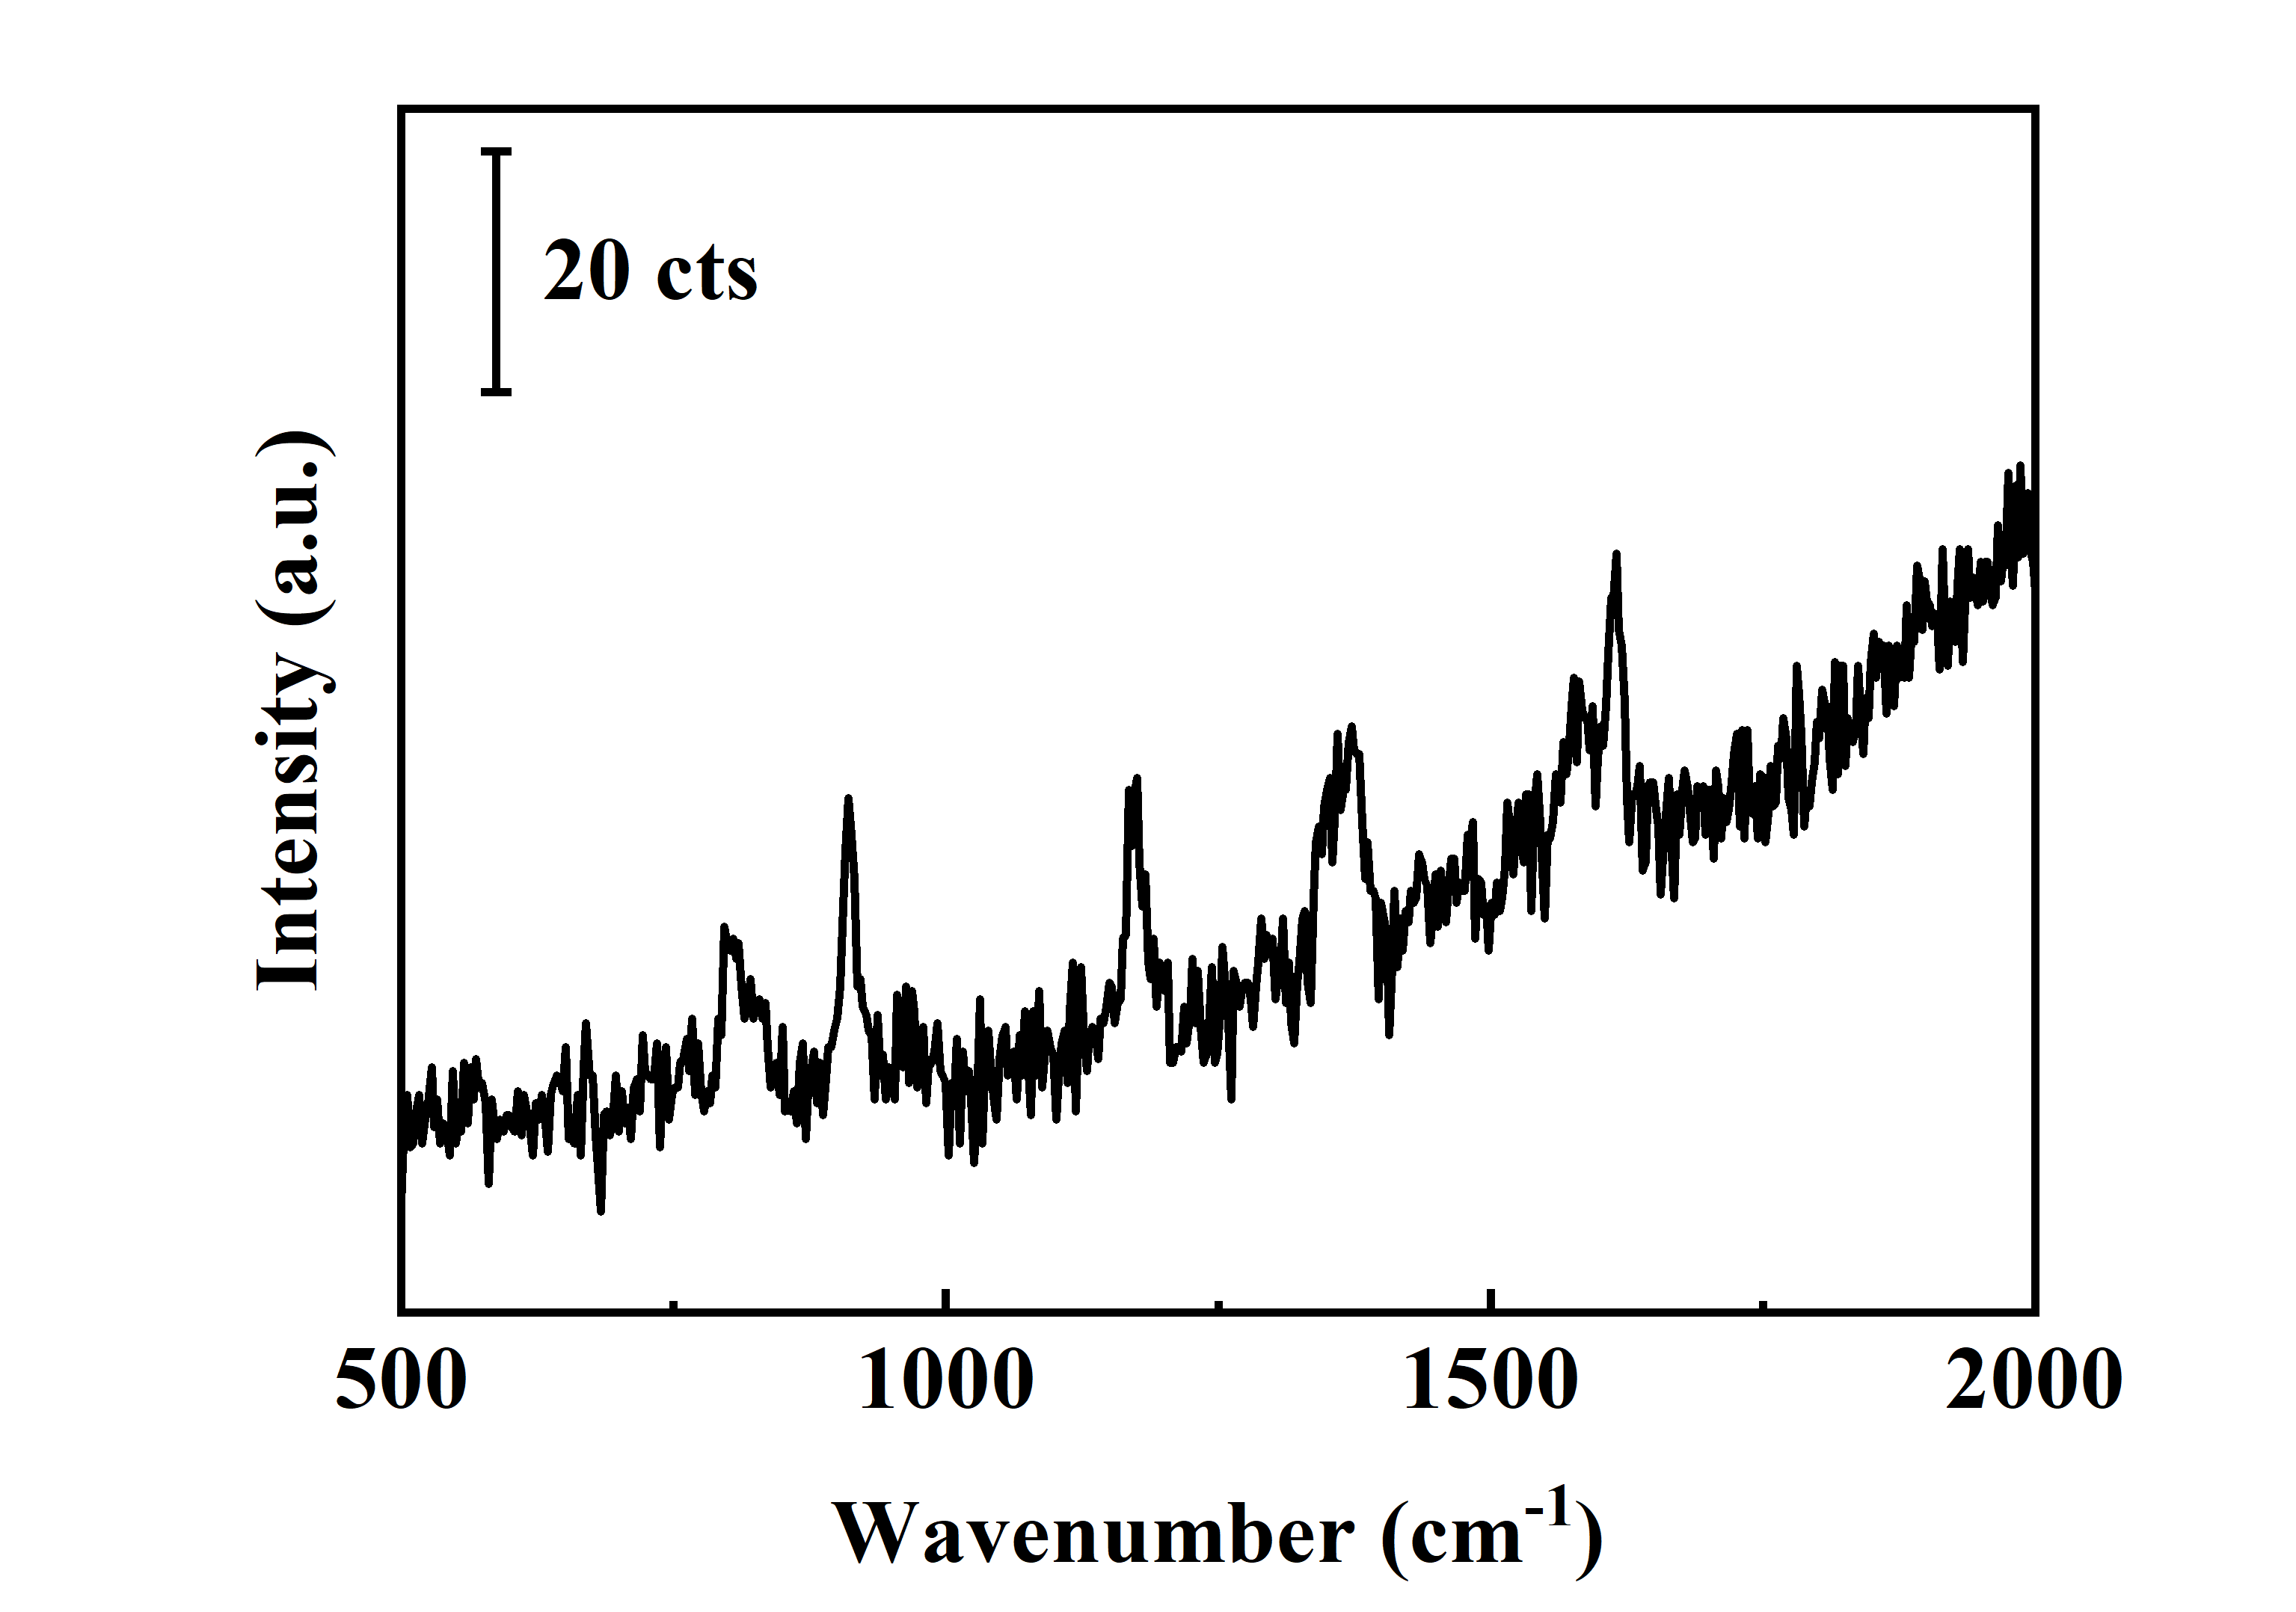


**Fig. S3.** Raman spectrum of CV with a concentration of 10-2 M after immersion in the PS substrate.

**
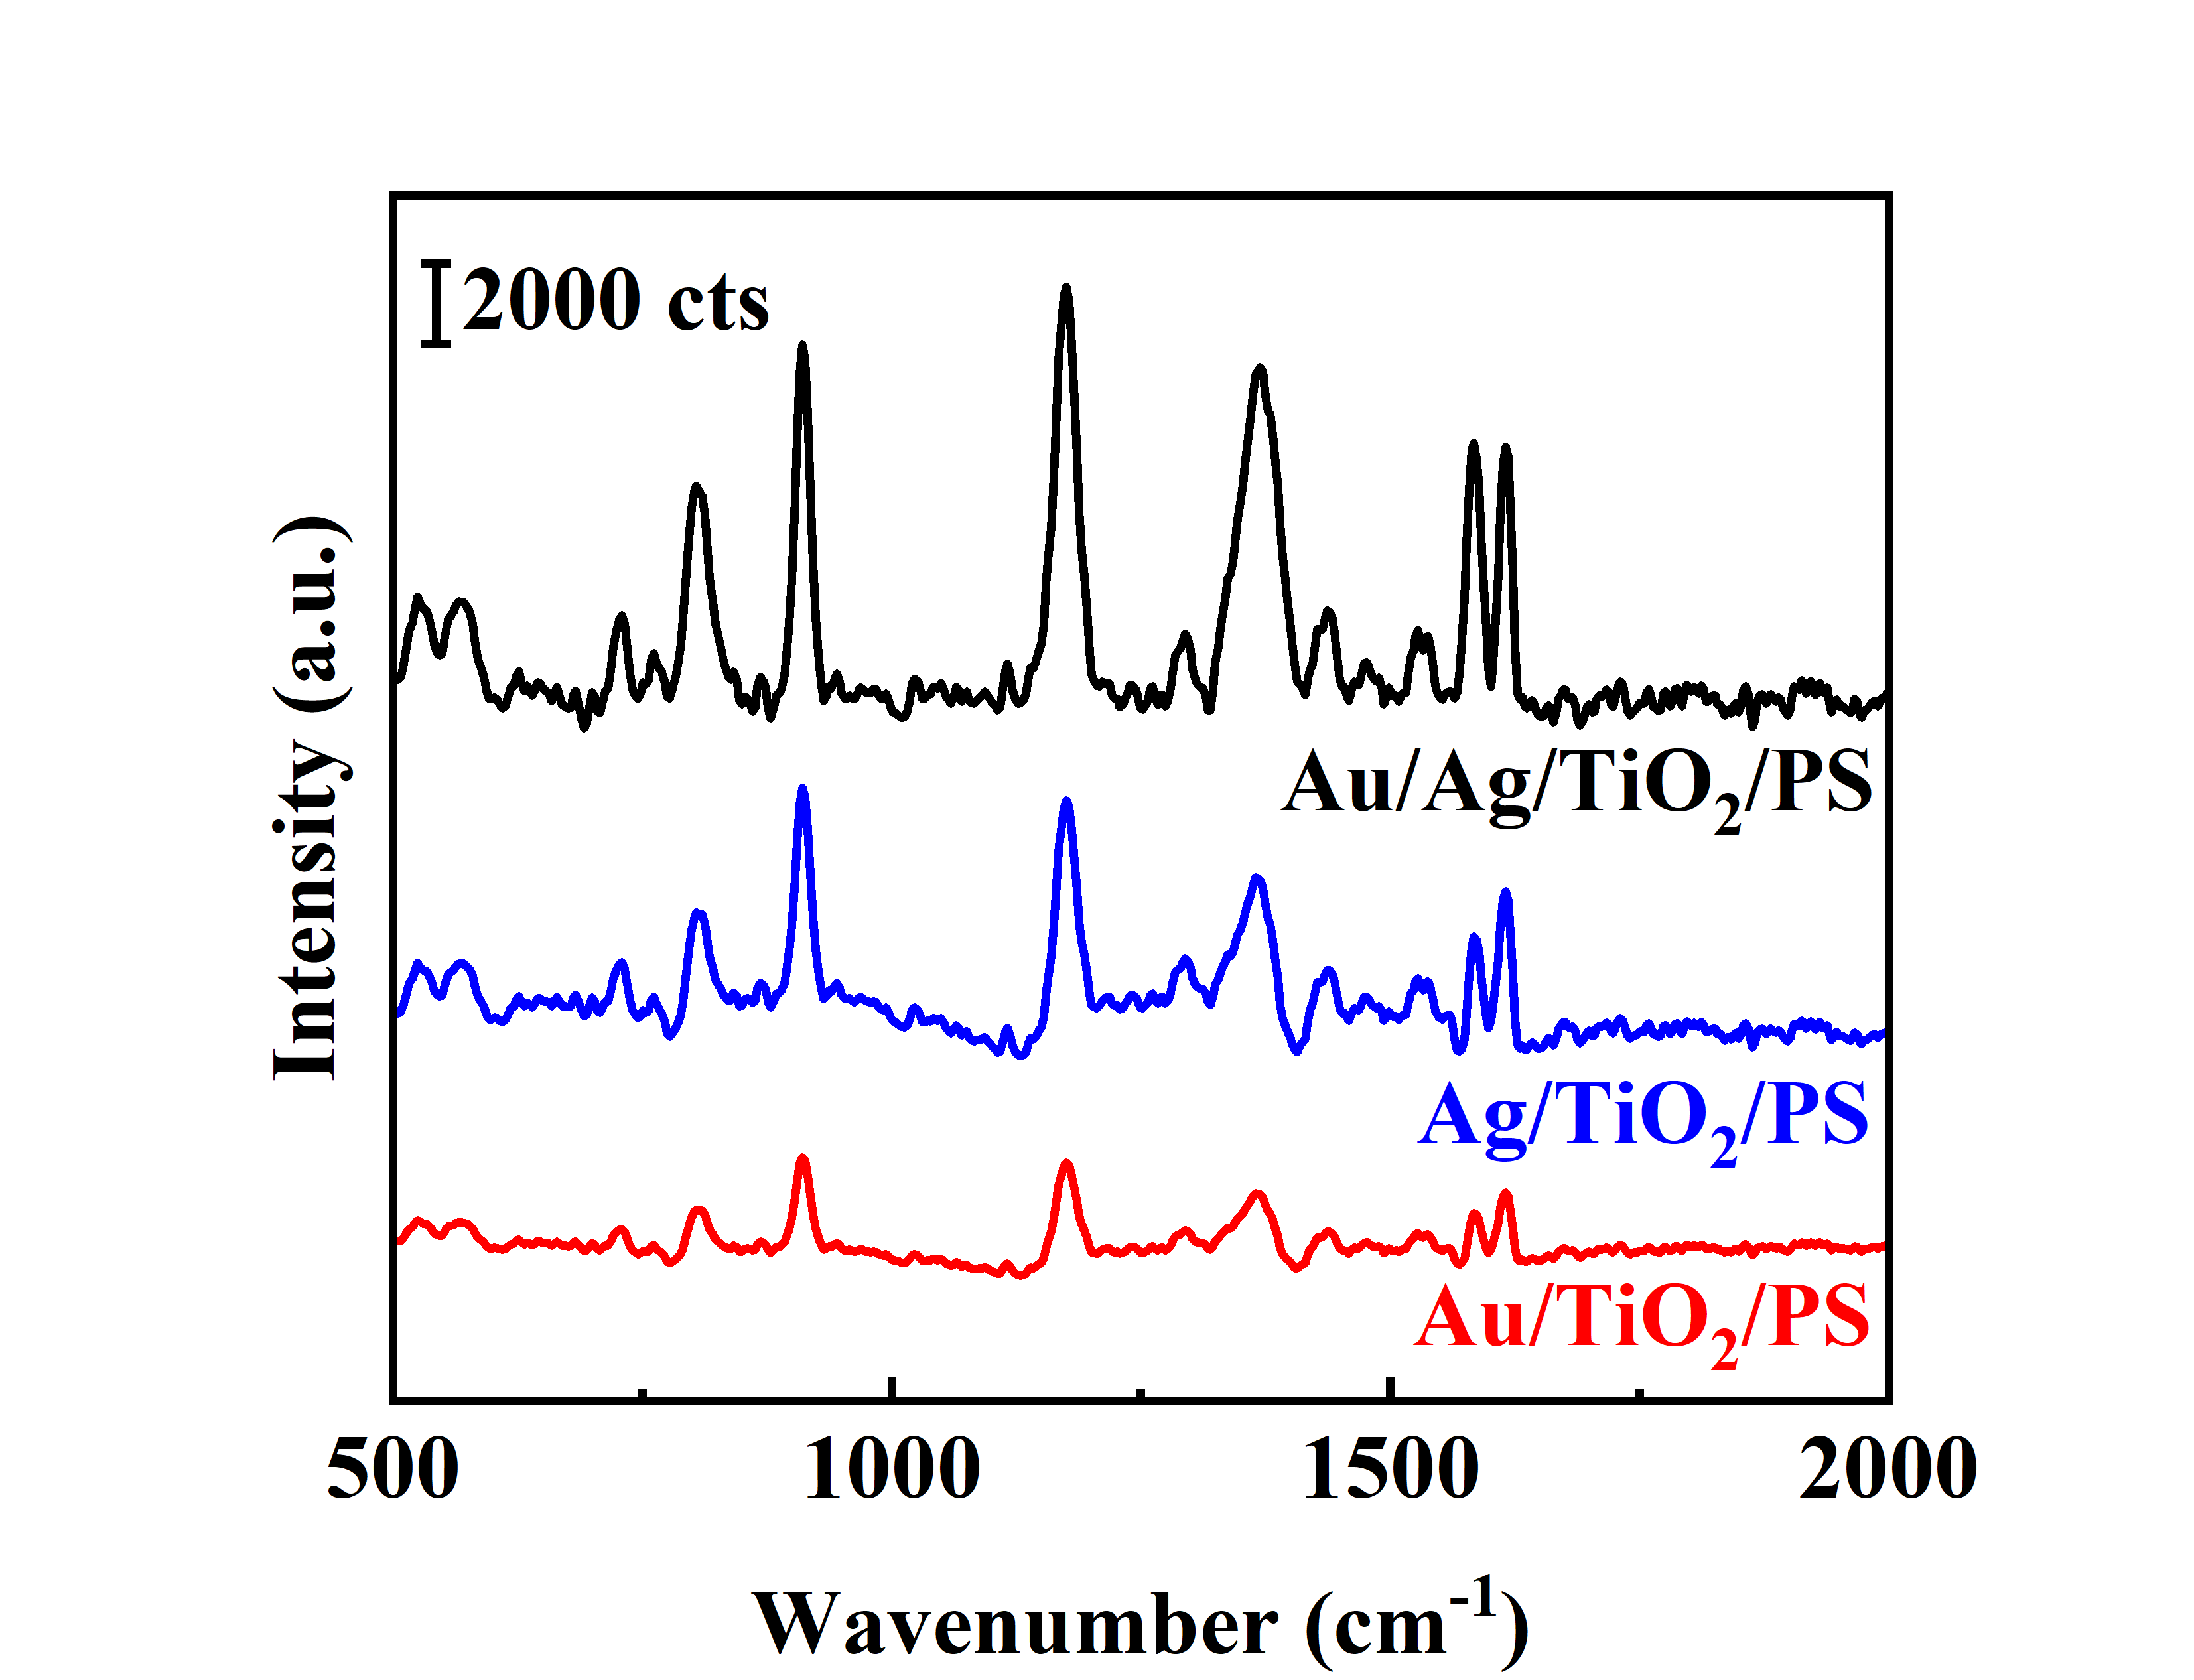
**

**Fig. S4.** Comparison of SERS spectra on TiO2/PS substrates modified with different noble metals.


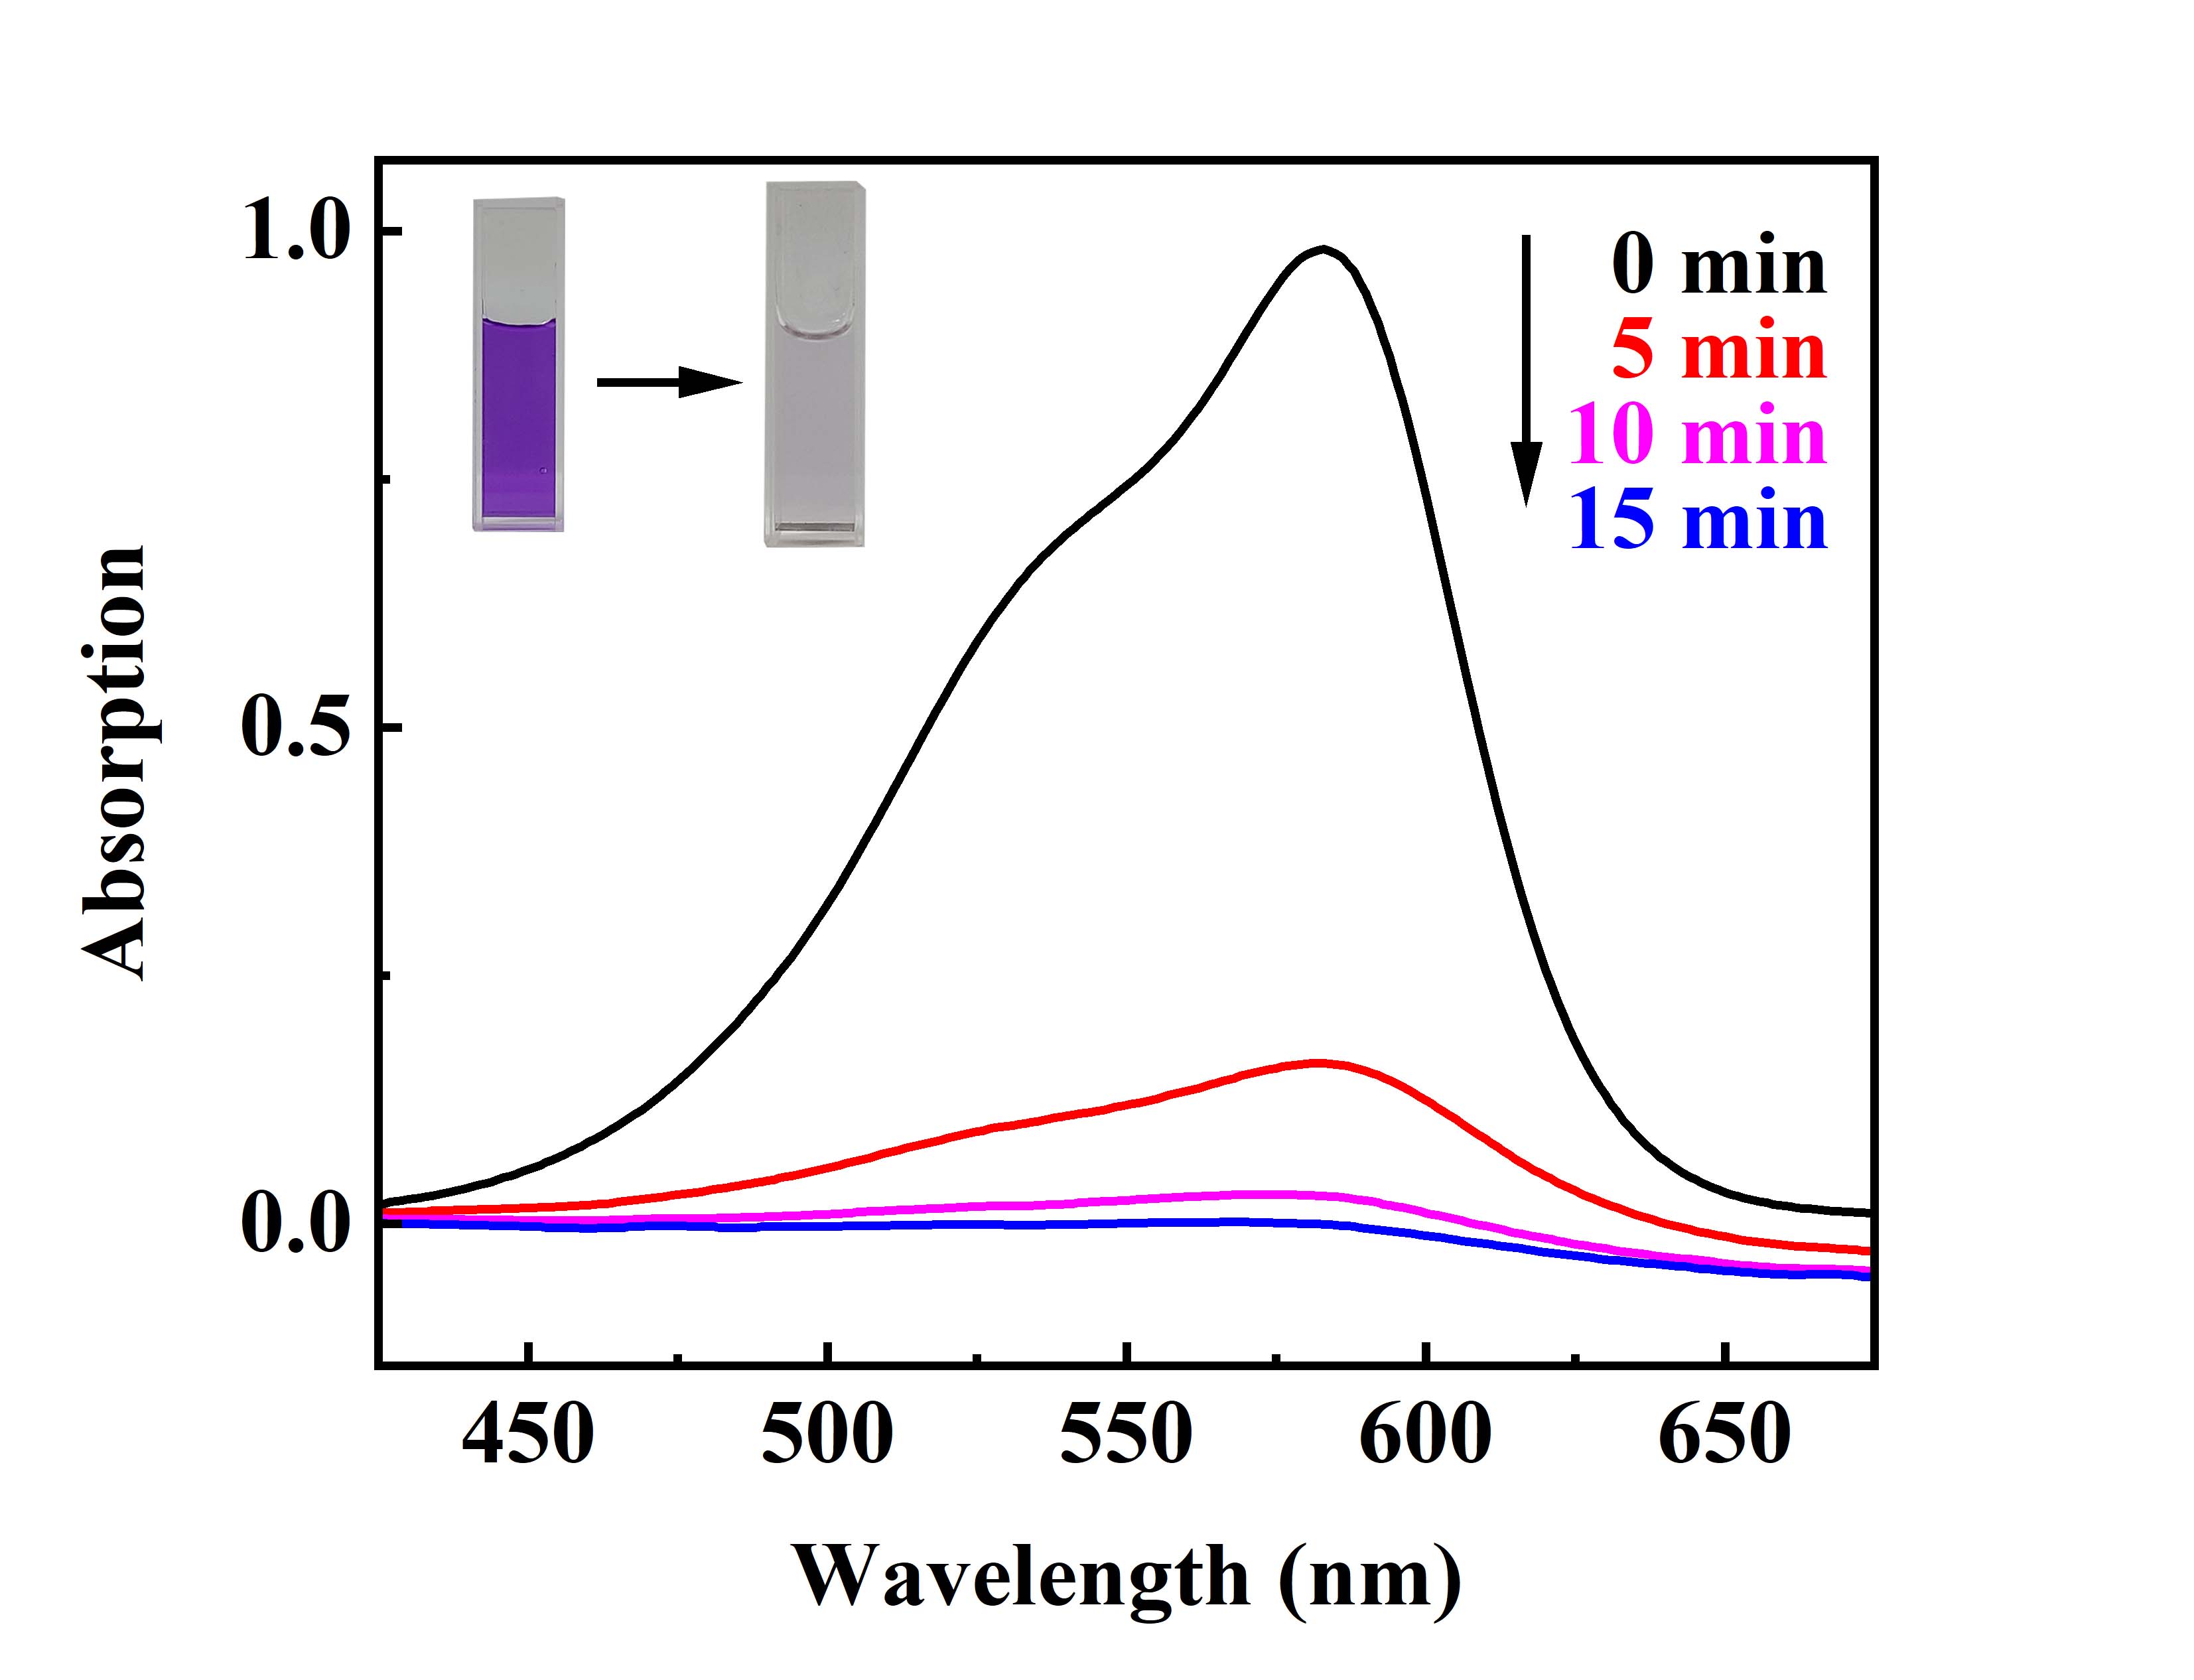


**Fig. S5.** UV-Vis absorption spectra of the CV solution after different photocatalysis times (Inset: Optical images of the CV solution before and after irradiation).

1. * Corresponding author:

   E-mail address: me2001@hpu.edu.cn. [↑](#footnote-ref-1)
2. * Corresponding author:

   E-mail address: [Cl721@hpu.edu.cn](mailto:Cl721@hpu.edu.cn). [↑](#footnote-ref-2)
